# Supplementary material
Source: PubMed Central journal article supplement (PMC6901465)

A

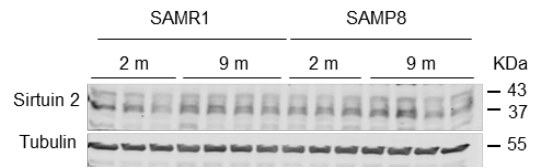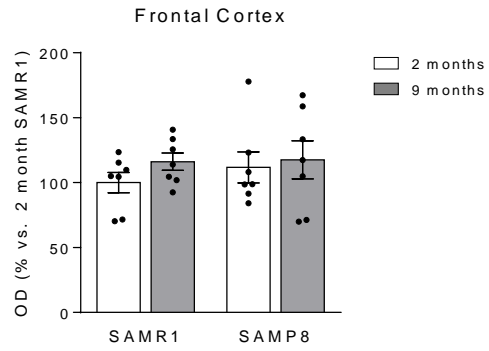

B

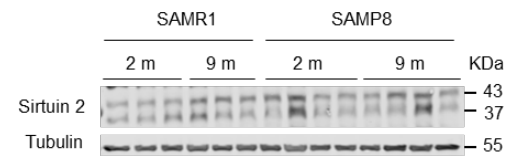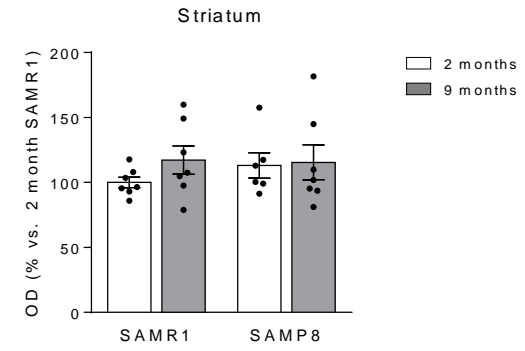

C

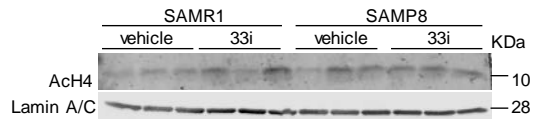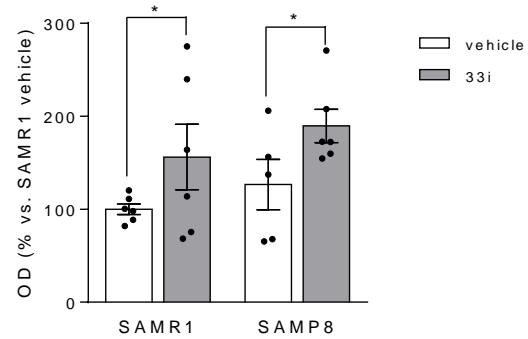

A

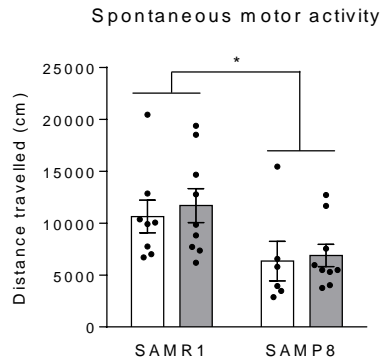

B

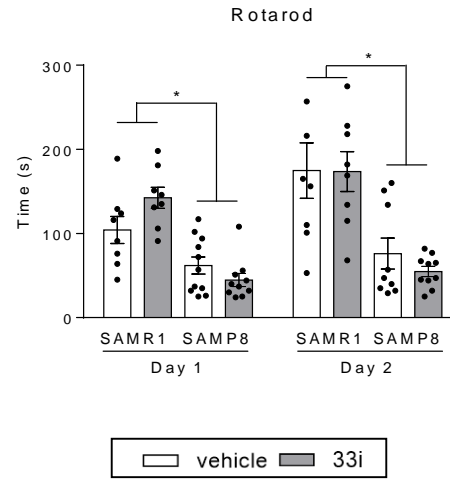

C

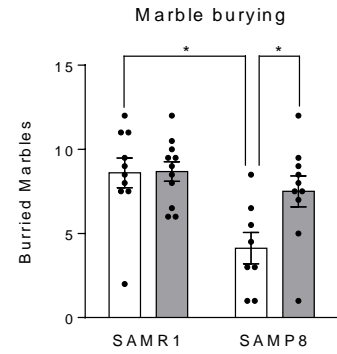

D

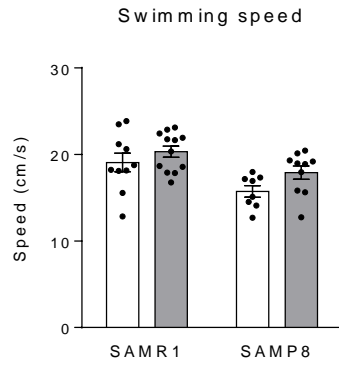

E

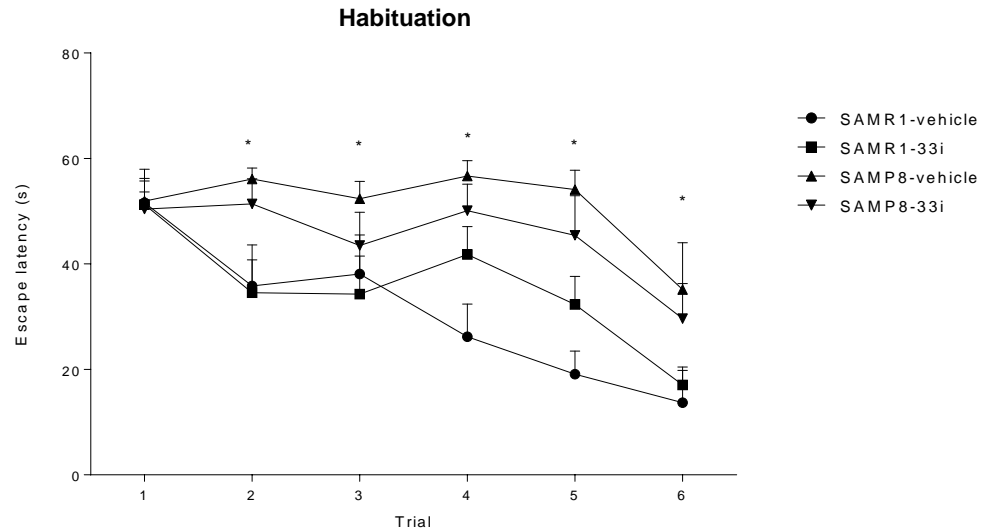

A

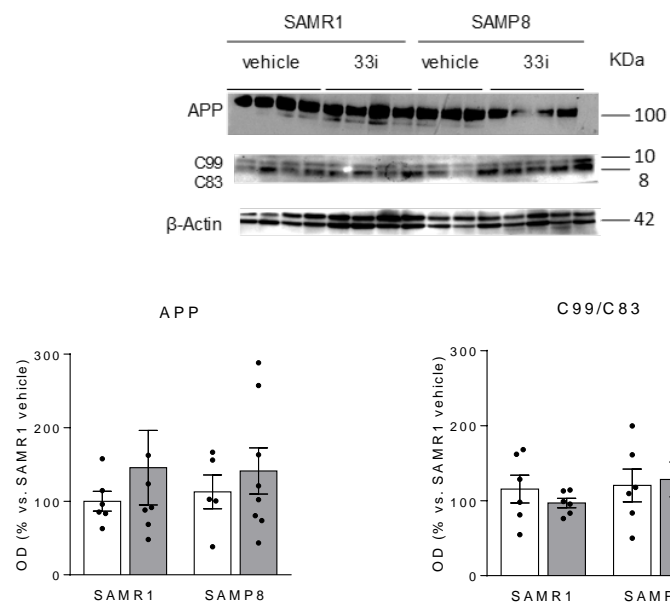

B

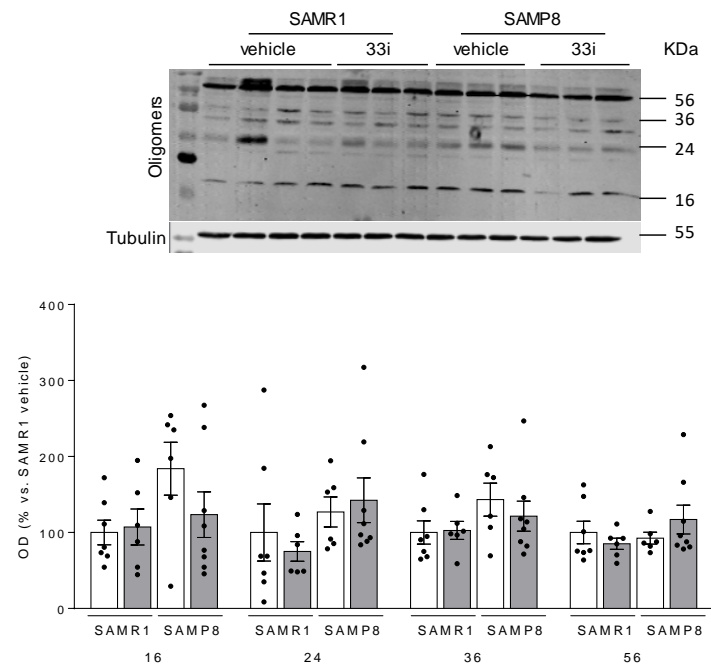

C

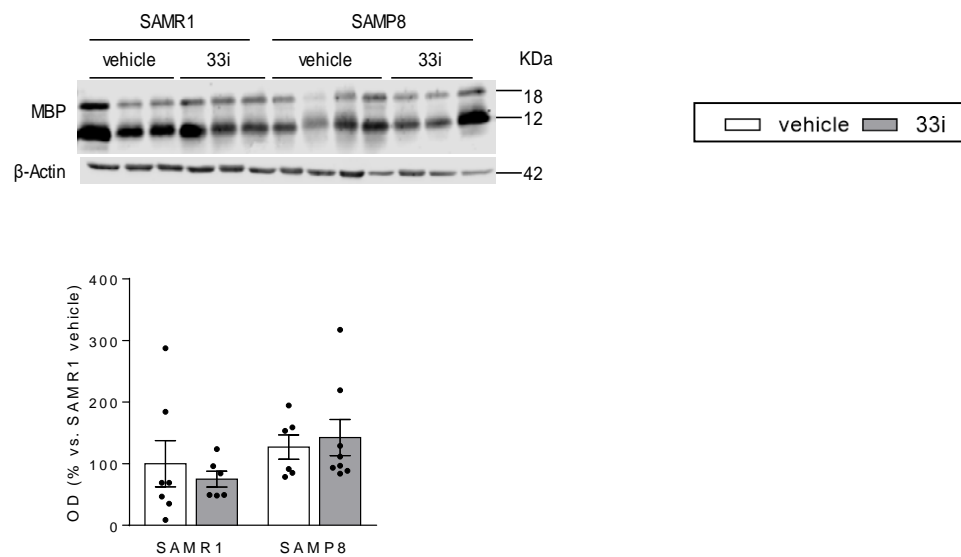

**A**

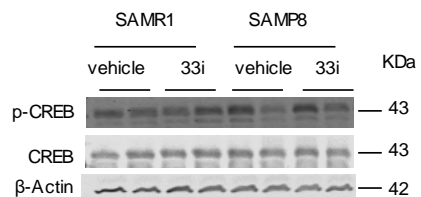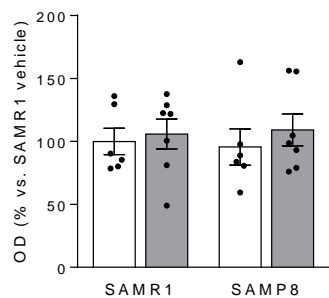

**B**

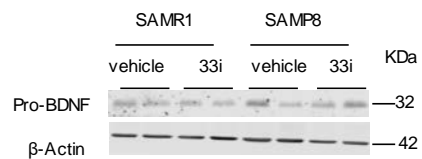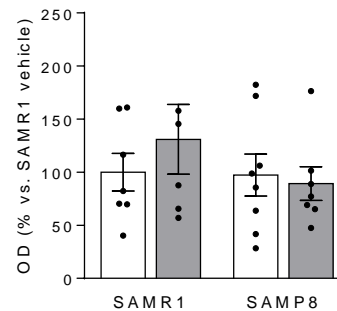

**C**

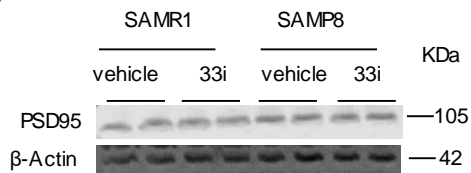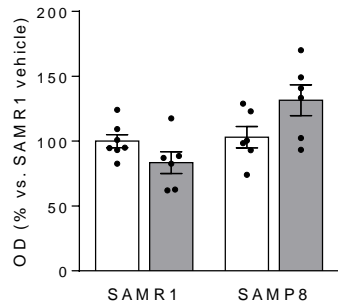

**D**

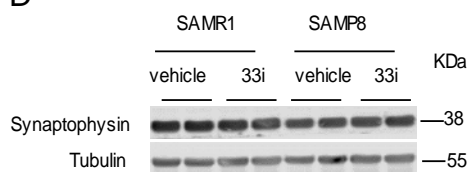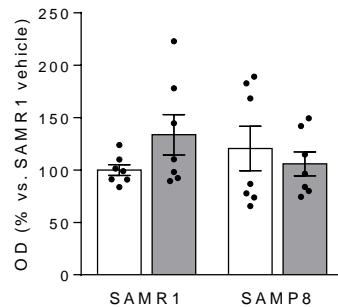

**E**

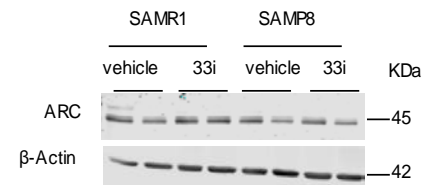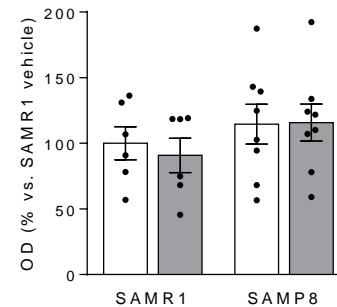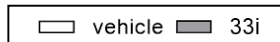

A

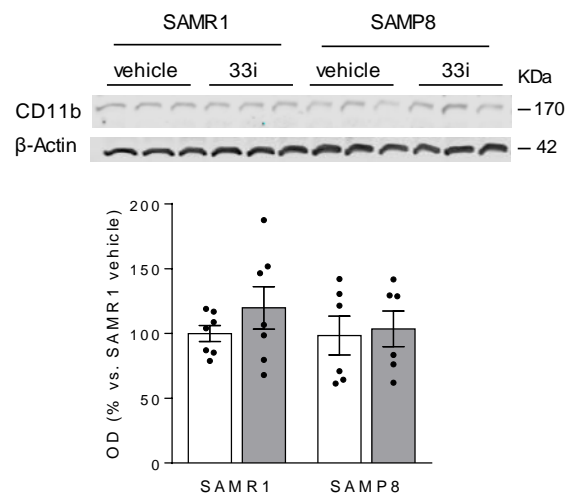

B

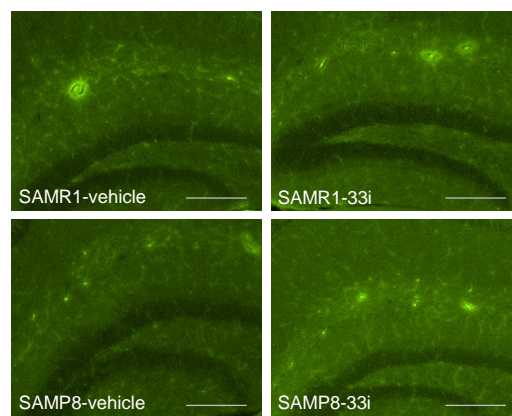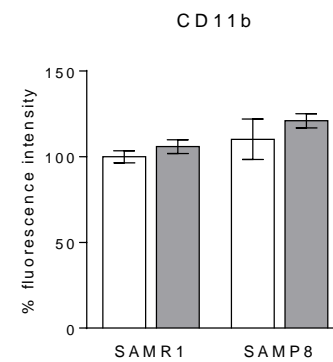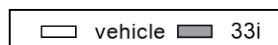

A

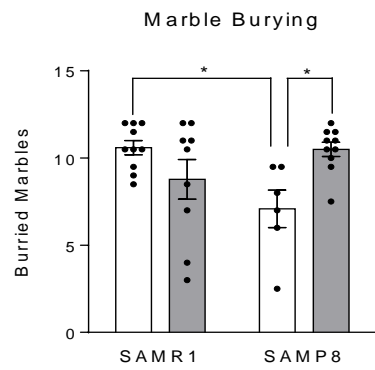

B

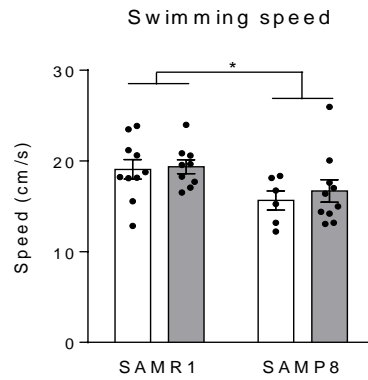

C

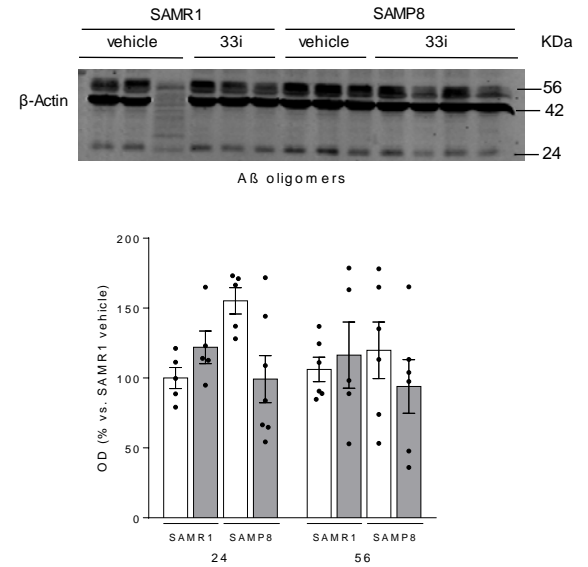

D

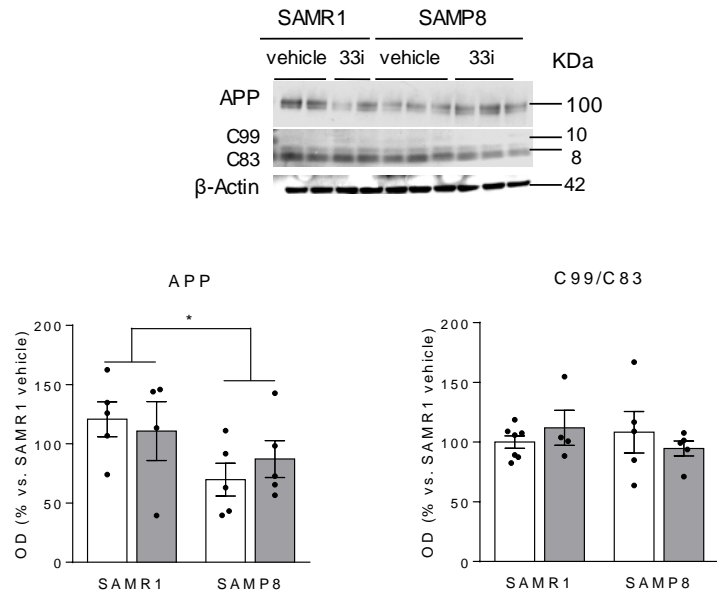

E

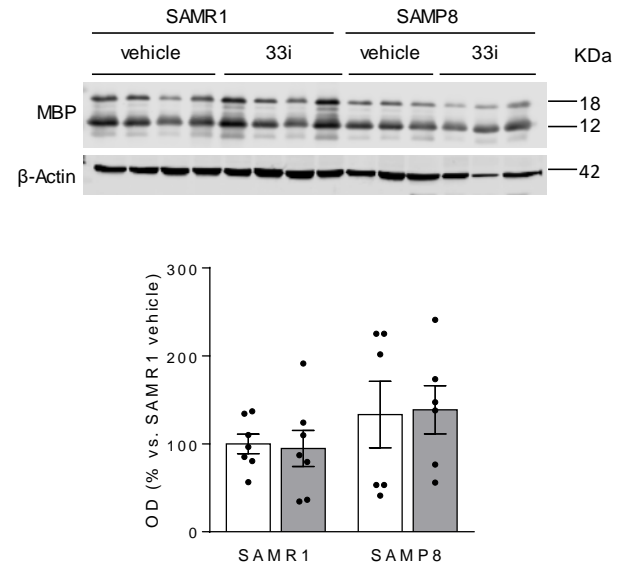

□ vehicle    ■ 33i

A

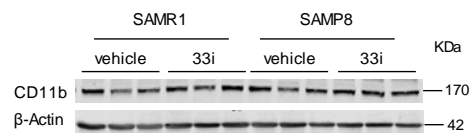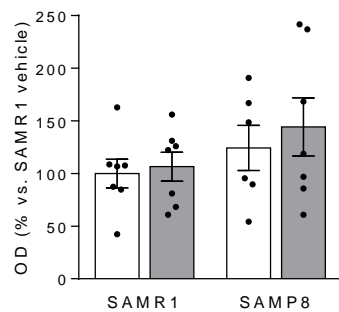

B

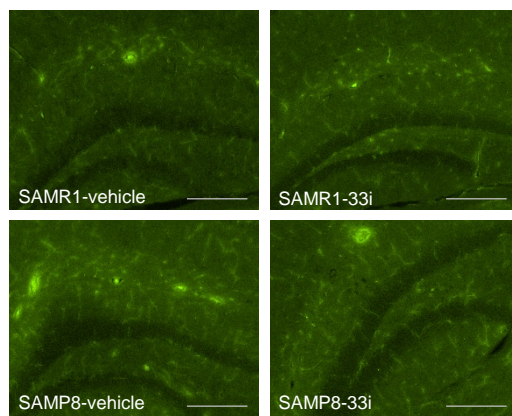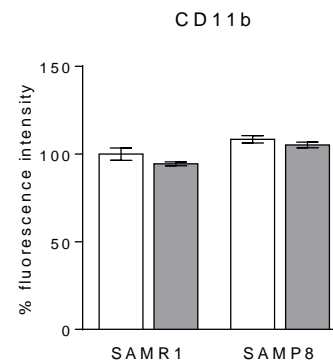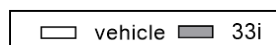

Supplement: 41386_2019_503_MOESM2_ESM.pdf [file 41386_2019_503_MOESM2_ESM.pdf]
